# Supplementary material for: A Novel 3D Osteoblast and Osteocyte Model Revealing Changes in Mineralization and Pro-osteoclastogenic Paracrine Signaling During Estrogen Deficiency
Source: PubMed Central journal article supplement (PMC7326002; doi:10.3389/fbioe.2020.00601), 2020-06-10
Supplement: Table_1.pdf [file Table_1.pdf]

Supplementary Material

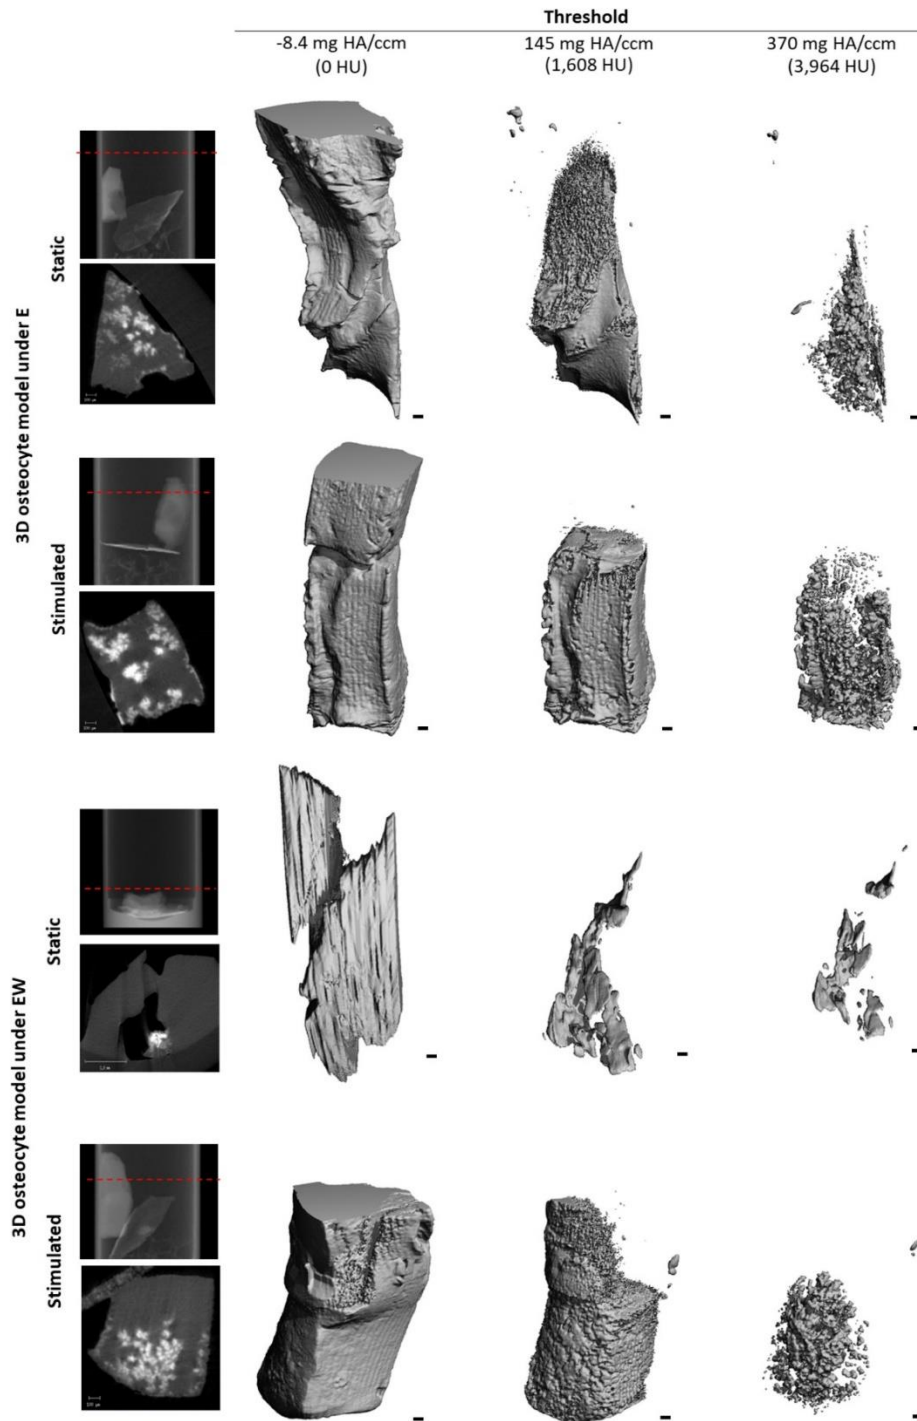

**Supplementary Figure 1:**  $\mu$ CT scans of constructs at day 21 presented as Greyscale images. Dashed red line indicates where cross-sectional image was taken from. Mineralized regions can be seen in white and hydrogel material as grey. 3D reconstructions of the VOI shown for thresholds -8.4, 145 and 370 mg HA/cm<sup>3</sup>. Scale bars = 100  $\mu$ m.

**Actin/DMP1 staining at day 1**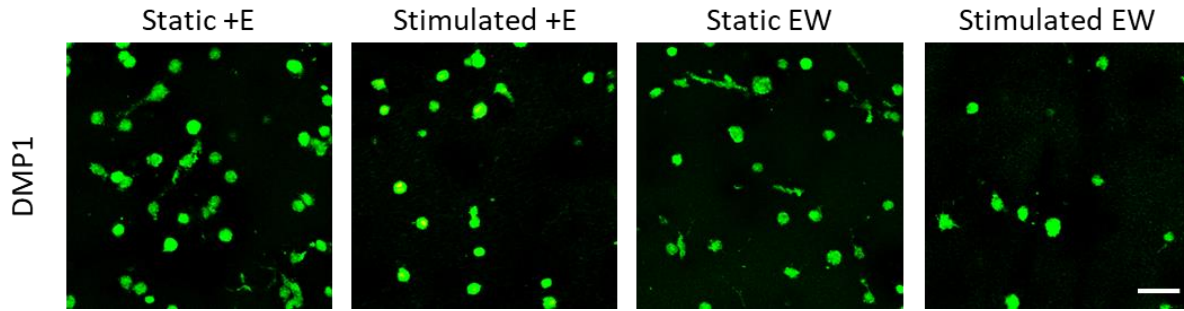

**Supplementary Figure 2:** Actin (green) and DMP1 (red) immunofluorescence staining of gelatin constructs at Day 1 confirming that there was no aspecific staining for DMP1 (red) due to the gelatin constructs or in cells prior to differentiation; Images were taken from the construct surface to a depth of approximately 65  $\mu\text{m}$ . Scale bar = 50  $\mu\text{m}$ .

**Collagen I staining**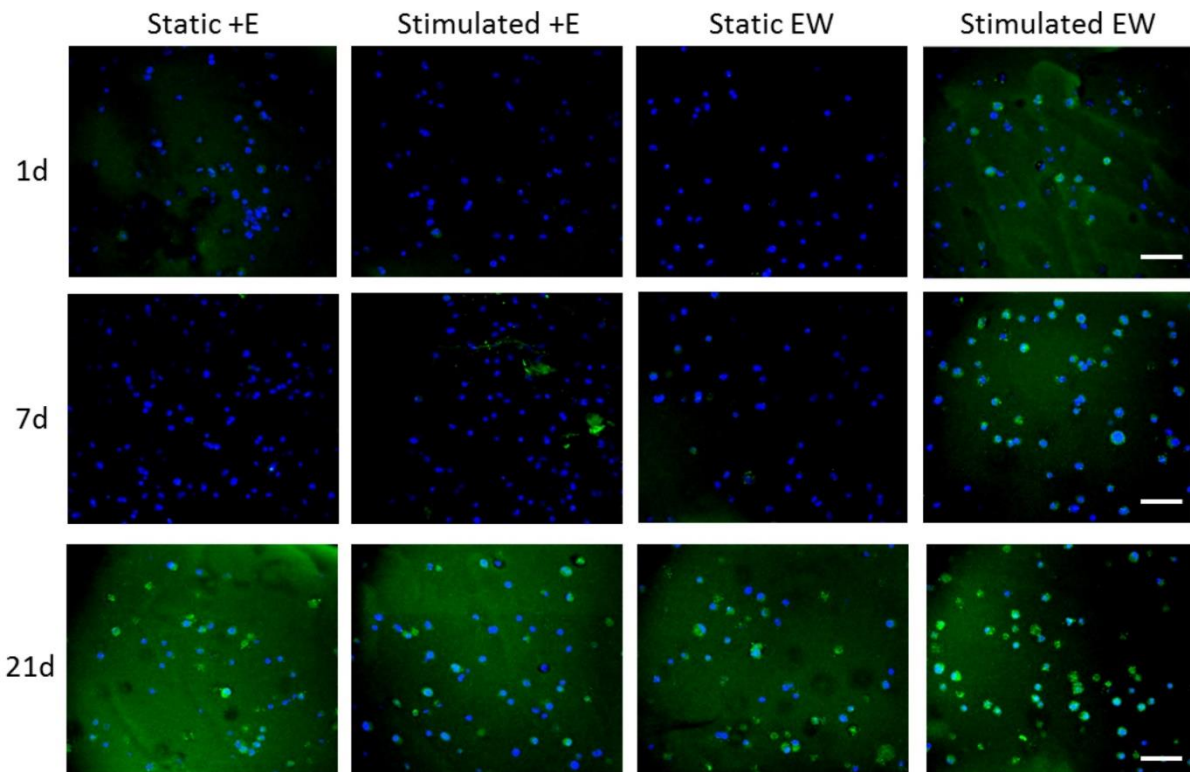

**Supplementary Figure 3:** Collagen 1 immunofluorescence staining of day 1, 7 and 21 constructs; Images were taken from the construct surface to a depth of approximately 65  $\mu\text{m}$ . Scale bar = 50  $\mu\text{m}$ .
